# Supplementary material
Source: HighWire-hosted journal article supplement (https://www.jrheum.org/highwire/filestream/40772/field_highwire_adjunct_files/0/210285DatalSuppl.pdf)
Supplement: 210285DatalSuppl.pdf [file 210285DatalSuppl.pdf]

## SUPPLEMENTARY MATERIAL

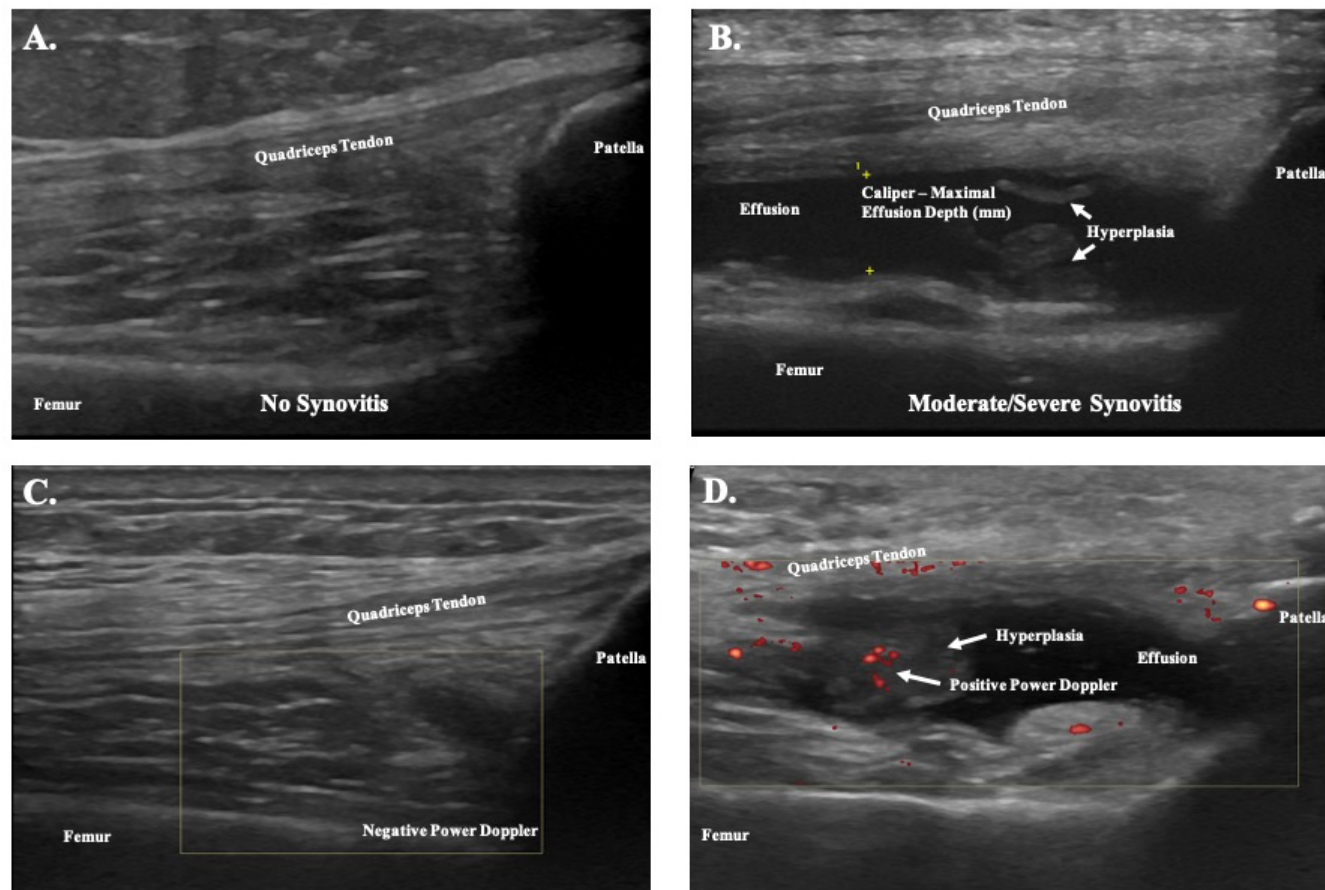

**Figure 1. Representative US images demonstrating OMERACT measurements.** The top panels show representative images of (A) no synovitis (Grade 0) and (B) Moderate/Severe synovitis (Grade 2/3). The bottom panels show (C) negative and (D) positive Power Doppler signal. Anatomical landmarks for patella, quadriceps tendon, and femur are labelled on each image (white). Example of effusion, hyperplasia, Power Doppler, and caliper measurement of maximal effusion depth are also indicated by labels and arrows (white).

**Supplementary Table 1. Multivariate logistic and linear regression model estimates for ICOAP intermittent and constant pain sensitivity analyses (n=410 knees)**

| <b>Variable</b>                                  | <b>Odds Ratios</b>   | <b>Robust Standard Errors</b> | <b>95% CIs</b>       |
|--------------------------------------------------|----------------------|-------------------------------|----------------------|
| <b>Model 1: Intermittent pain (No/Yes)</b>       |                      |                               |                      |
| <b>Synovitis Grade</b>                           |                      |                               |                      |
| None                                             | Reference            | Reference                     | Reference            |
| Mild                                             | 0.80                 | 0.22                          | 0.47 to 1.35         |
| Moderate/Severe                                  | 1.10                 | 0.34                          | 0.60 to 2.01         |
| <b>Maximal Effusion Depth (mm)</b>               | <b>0.99</b>          | <b>0.03</b>                   | <b>0.92 to 1.05</b>  |
| <b>Model 2: Constant pain (No/Yes)</b>           |                      |                               |                      |
| <b>Synovitis Grade</b>                           |                      |                               |                      |
| None                                             | Reference            | Reference                     | Reference            |
| Mild                                             | 1.13                 | 0.30                          | 0.67 to 1.90         |
| Moderate/Severe                                  | <b>1.86*</b>         | <b>0.55</b>                   | <b>1.04 to 3.32</b>  |
| <b>Maximal effusion depth (mm)</b>               | <b>1.10*</b>         | <b>0.04</b>                   | <b>1.03 to 1.18</b>  |
| <b>Variable</b>                                  | <b>β coefficient</b> | <b>Robust Standard Error</b>  | <b>95% CIs</b>       |
| <b>Model 1: Intermittent pain subscale score</b> |                      |                               |                      |
| <b>Synovitis Grade</b>                           |                      |                               |                      |
| None                                             | Reference            | Reference                     | Reference            |
| Mild                                             | -2.82                | 3.27                          | -9.26 to 3.63        |
| Moderate/Severe                                  | 3.99                 | 3.70                          | -3.30 to 11.28       |
| <b>Maximal effusion depth (mm)</b>               | <b>0.51</b>          | <b>0.44</b>                   | <b>-0.36 to 1.38</b> |
| <b>Model 2: Constant pain subscale score</b>     |                      |                               |                      |
| <b>Synovitis Grade</b>                           |                      |                               |                      |
| None                                             | Reference            | Reference                     | Reference            |
| Mild                                             | 2.59                 | 3.41                          | -4.11 to 9.29        |
| Moderate/Severe                                  | <b>8.19*</b>         | <b>3.92</b>                   | <b>0.48 to 15.89</b> |
| <b>Maximal effusion depth (mm)</b>               | <b>1.37*</b>         | <b>0.47</b>                   | <b>0.46 to 2.29</b>  |

Adjusting for age, sex, BMI, and radiographic stage (early/late)

\*Indicates significance at the 5% level

**Supplementary Table 2. Multivariate logistic regression model estimates for ICOAP intermittent and constant pain (n=453 knees)**

| Variable                                   | Odds Ratios | Robust Standard Errors | 95% CIs      |
|--------------------------------------------|-------------|------------------------|--------------|
| <b>Model 1: Intermittent pain (No/Yes)</b> |             |                        |              |
| <b>Power Doppler</b>                       |             |                        |              |
| Absent                                     | Reference   | Reference              | Reference    |
| Present                                    | 1.51        | 0.40                   | 0.89 to 2.55 |
| <b>Hyperplasia</b>                         |             |                        |              |
| Absent                                     | Reference   | Reference              | Reference    |
| Present                                    | 0.94        | 0.23                   | 0.58 to 1.53 |
| <b>Effusion</b>                            |             |                        |              |
| Absent                                     | Reference   | Reference              | Reference    |
| Present                                    | 1.01        | 0.25                   | 0.62 to 1.63 |
| <b>Model 2: Constant pain (No/Yes)</b>     |             |                        |              |
| <b>Power Doppler</b>                       |             |                        |              |
| Absent                                     | Reference   | Reference              | Reference    |
| Present                                    | 0.93        | 0.23                   | 0.58 to 1.50 |
| <b>Hyperplasia</b>                         |             |                        |              |
| Absent                                     | Reference   | Reference              | Reference    |
| Present                                    | 1.25        | 0.30                   | 0.78 to 1.99 |
| <b>Effusion</b>                            |             |                        |              |
| Absent                                     | Reference   | Reference              | Reference    |
| Present                                    | 1.13        | 0.26                   | 0.71 to 1.77 |

Adjusting for age, sex, BMI, and radiographic stage (early/late)

\*Indicates significance at the 5% level

**Supplementary Table 3. Multivariate linear regression model estimates for ICOAP intermittent and constant pain scores (n=453 knees)**

| Variable                                         | $\beta$ coefficient | Robust Standard Error | 95% CIs        |
|--------------------------------------------------|---------------------|-----------------------|----------------|
| <b>Model 1: Intermittent pain subscale score</b> |                     |                       |                |
| <b>Power Doppler</b>                             |                     |                       |                |
| Absent                                           | Reference           | Reference             | Reference      |
| Present                                          | 3.83                | 3.01                  | -2.09 to 9.75  |
| <b>Hyperplasia</b>                               |                     |                       |                |
| Absent                                           | Reference           | Reference             | Reference      |
| Present                                          | 2.00                | 2.95                  | -3.79 to 7.78  |
| <b>Effusion</b>                                  |                     |                       |                |
| Absent                                           | Reference           | Reference             | Reference      |
| Present                                          | 0.20                | 2.98                  | -5.67 to 6.06  |
| <b>Model 2: Constant pain subscale score</b>     |                     |                       |                |
| <b>Power Doppler</b>                             |                     |                       |                |
| Absent                                           | Reference           | Reference             | Reference      |
| Present                                          | -0.56               | 3.26                  | -6.96 to 5.84  |
| <b>Hyperplasia</b>                               |                     |                       |                |
| Absent                                           | Reference           | Reference             | Reference      |
| Present                                          | 4.58                | 3.07                  | -1.46 to 10.62 |
| <b>Effusion</b>                                  |                     |                       |                |
| Absent                                           | Reference           | Reference             | Reference      |
| Present                                          | 2.04                | 3.09                  | -4.04 to 8.12  |

Adjusting for age, sex, BMI, and radiographic stage (early/late)

\*Indicates significance at the 5% level

**Supplementary Table 4. Multivariate logistic model estimates for secondary analyses (early-/late-stage OA)**

| <b>Early-stage OA (KL ≤ 2) (n=214 knees)</b> |                   |                              |                |
|----------------------------------------------|-------------------|------------------------------|----------------|
| <b>Variable</b>                              | <b>Odds Ratio</b> | <b>Robust Standard Error</b> | <b>95% CIs</b> |
| <b>Model 1: Intermittent pain (No/Yes)</b>   |                   |                              |                |
| <b>Power Doppler</b>                         |                   |                              |                |
| Absent                                       | Reference         | Reference                    | Reference      |
| Present                                      | 1.24              | 0.49                         | 0.58 to 2.69   |
| <b>Hyperplasia</b>                           |                   |                              |                |
| Absent                                       | Reference         | Reference                    | Reference      |
| Present                                      | 0.96              | 0.33                         | 0.52 to 1.80   |
| <b>Effusion</b>                              |                   |                              |                |
| Absent                                       | Reference         | Reference                    | Reference      |
| Present                                      | 1.15              | 0.38                         | 0.60 to 2.18   |
| <b>Model 2: Constant pain (No/Yes)</b>       |                   |                              |                |
| <b>Power Doppler</b>                         |                   |                              |                |
| Absent                                       | Reference         | Reference                    | Reference      |
| Present                                      | 1.05              | 0.41                         | 0.49 to 2.25   |
| <b>Hyperplasia</b>                           |                   |                              |                |
| Absent                                       | Reference         | Reference                    | Reference      |
| Present                                      | 1.81              | 0.61                         | 0.93 to 3.52   |
| <b>Effusion</b>                              |                   |                              |                |
| Absent                                       | Reference         | Reference                    | Reference      |
| Present                                      | 1.81              | 0.64                         | 0.91 to 3.61   |
| <b>Late-stage OA (KL ≥ 3) (n=239 knees)</b>  |                   |                              |                |
| <b>Variable</b>                              | <b>Odds Ratio</b> | <b>Robust Standard Error</b> | <b>95% CIs</b> |
| <b>Model 3: Intermittent pain (No/Yes)</b>   |                   |                              |                |
| <b>Power Doppler</b>                         |                   |                              |                |
| Absent                                       | Reference         | Reference                    | Reference      |
| Present                                      | 1.55              | 0.58                         | 0.75 to 3.23   |
| <b>Hyperplasia</b>                           |                   |                              |                |
| Absent                                       | Reference         | Reference                    | Reference      |
| Present                                      | 0.80              | 0.31                         | 0.38 to 1.72   |
| <b>Effusion</b>                              |                   |                              |                |
| Absent                                       | Reference         | Reference                    | Reference      |
| Present                                      | 0.73              | 0.27                         | 0.36 to 1.52   |
| <b>Model 4: Constant pain (No/Yes)</b>       |                   |                              |                |
| <b>Power Doppler</b>                         |                   |                              |                |
| Absent                                       | Reference         | Reference                    | Reference      |
| Present                                      | 0.91              | 0.29                         | 0.49 to 1.68   |
| <b>Hyperplasia</b>                           |                   |                              |                |
| Absent                                       | Reference         | Reference                    | Reference      |
| Present                                      | 0.87              | 0.31                         | 0.44 to 1.73   |
| <b>Effusion</b>                              |                   |                              |                |
| Absent                                       | Reference         | Reference                    | Reference      |
| Present                                      | 0.75              | 0.26                         | 0.39 to 1.46   |
| Adjusting for age, sex, and BMI              |                   |                              |                |
| *Indicates significance at the 5% level      |                   |                              |                |

**Supplementary Table 5. Multivariate linear model estimates for secondary analyses (early-/late-stage OA)**

| <b>Early-stage OA (KL ≤ 2) (n=214 knees)</b>     |                      |                              |                |
|--------------------------------------------------|----------------------|------------------------------|----------------|
| <b>Variable</b>                                  | <b>β coefficient</b> | <b>Robust Standard Error</b> | <b>95% CIs</b> |
| <b>Model 1: Intermittent pain subscale score</b> |                      |                              |                |
| <b>Power Doppler</b>                             |                      |                              |                |
| Absent                                           | Reference            | Reference                    | Reference      |
| Present                                          | 0.84                 | 4.32                         | -7.68 to 9.35  |
| <b>Hyperplasia</b>                               |                      |                              |                |
| Absent                                           | Reference            | Reference                    | Reference      |
| Present                                          | 1.09                 | 3.68                         | -6.17 to 8.35  |
| <b>Effusion</b>                                  |                      |                              |                |
| Absent                                           | Reference            | Reference                    | Reference      |
| Present                                          | -0.18                | 3.90                         | -7.87 to 7.51  |
| <b>Model 2: Constant pain subscale score</b>     |                      |                              |                |
| <b>Power Doppler</b>                             |                      |                              |                |
| Absent                                           | Reference            | Reference                    | Reference      |
| Present                                          | 0.66                 | 4.52                         | -8.24 to 9.56  |
| <b>Hyperplasia</b>                               |                      |                              |                |
| Absent                                           | Reference            | Reference                    | Reference      |
| Present                                          | 6.60                 | 3.60                         | -0.49 to 13.69 |
| <b>Effusion</b>                                  |                      |                              |                |
| Absent                                           | Reference            | Reference                    | Reference      |
| Present                                          | 5.53                 | 3.65                         | -1.67 to 12.72 |
| <b>Late-stage OA (KL ≥ 3) (n=239 knees)</b>      |                      |                              |                |
| <b>Variable</b>                                  | <b>β coefficient</b> | <b>Robust Standard Error</b> | <b>95% CIs</b> |
| <b>Model 1: Intermittent pain subscale score</b> |                      |                              |                |
| <b>Power Doppler</b>                             |                      |                              |                |
| Absent                                           | Reference            | Reference                    | Reference      |
| Present                                          | 5.00                 | 4.27                         | -3.42 to 13.41 |
| <b>Hyperplasia</b>                               |                      |                              |                |
| Absent                                           | Reference            | Reference                    | Reference      |
| Present                                          | 2.04                 | 4.85                         | -7.52 to 11.60 |
| <b>Effusion</b>                                  |                      |                              |                |
| Absent                                           | Reference            | Reference                    | Reference      |
| Present                                          | -0.39                | 4.69                         | -9.63 to 8.84  |
| <b>Model 2: Constant pain subscale score</b>     |                      |                              |                |
| <b>Power Doppler</b>                             |                      |                              |                |
| Absent                                           | Reference            | Reference                    | Reference      |
| Present                                          | -0.55                | 4.74                         | -9.89 to 8.80  |
| <b>Hyperplasia</b>                               |                      |                              |                |
| Absent                                           | Reference            | Reference                    | Reference      |
| Present                                          | 2.98                 | 5.41                         | -7.68 to 13.64 |
| <b>Effusion</b>                                  |                      |                              |                |
| Absent                                           | Reference            | Reference                    | Reference      |
| Present                                          | -0.78                | 5.28                         | -11.19 to 9.63 |

Adjusting for age, sex, and BMI

\*Indicates significance at the 5% level

**Supplementary Table 6. Multivariate linear regression model estimates for KOOS pain and US measures of inflammation**

| Variable                                                                          | $\beta$ coefficient | Robust Standard Errors | 95% CIs                |
|-----------------------------------------------------------------------------------|---------------------|------------------------|------------------------|
| <b>Model 1: KOOS Pain (n=453 knees)</b>                                           |                     |                        |                        |
| <b>Synovitis Grade</b>                                                            |                     |                        |                        |
| None                                                                              | Reference           | Reference              | Reference              |
| Mild                                                                              | -3.48               | 2.52                   | -8.42 to 1.46          |
| Moderate/Severe                                                                   | <b>-10.54*</b>      | <b>2.63</b>            | <b>-15.70 to -5.38</b> |
| <b>Maximal effusion depth (mm)</b>                                                | <b>-1.30*</b>       | <b>0.30</b>            | <b>-1.89 to -0.72</b>  |
| <b>Model 2: KOOS Pain - Early-stage OA (KL <math>\leq</math> 2) (n=214 knees)</b> |                     |                        |                        |
| <b>Synovitis Grade</b>                                                            |                     |                        |                        |
| None                                                                              | Reference           | Reference              | Reference              |
| Mild                                                                              | -2.98               | 3.37                   | -9.62 to 3.67          |
| Moderate/Severe                                                                   | <b>-12.70*</b>      | <b>3.92</b>            | <b>-20.43 to -4.97</b> |
| <b>Maximal effusion depth (mm)</b>                                                | <b>-1.44*</b>       | <b>0.51</b>            | <b>-2.44 to -0.44</b>  |
| <b>Model 3: KOOS Pain - Late-stage OA (KL <math>\geq</math> 3) (n=239 knees)</b>  |                     |                        |                        |
| <b>Synovitis Grade</b>                                                            |                     |                        |                        |
| None                                                                              | Reference           | Reference              | Reference              |
| Mild                                                                              | -4.00               | 3.84                   | -11.56 to 3.56         |
| Moderate/Severe                                                                   | <b>-9.12*</b>       | <b>3.71</b>            | <b>-16.43 to -1.81</b> |
| <b>Maximal effusion depth (mm)</b>                                                | <b>-1.21*</b>       | <b>0.36</b>            | <b>-1.92 to -0.50</b>  |

Model 1: Adjusting for age, sex, BMI, and radiographic stage (early/late)

Model 2 and 3: Adjusting for age, sex, and BMI

\*Indicates significance at the 5% level

CI, confidence interval; KL, Kellgren-Lawrence grade; KOOS, Knee Injury and Osteoarthritis Outcome Score; mm, millimetre; n, number; OA, osteoarthritis

**Supplementary Table 7. Multivariate linear regression model estimates for KOOS pain (n=453 knees)**

| Variable                  | $\beta$ coefficient | Robust Standard Errors | 95% CIs         |
|---------------------------|---------------------|------------------------|-----------------|
| <b>Model 1: KOOS Pain</b> |                     |                        |                 |
| <b>Power Doppler</b>      |                     |                        |                 |
| Absent                    | Reference           | Reference              | Reference       |
| Present                   | -2.82               | 2.29                   | -7.32 to 1.68   |
| <b>Hyperplasia</b>        |                     |                        |                 |
| Absent                    | Reference           | Reference              | Reference       |
| Present                   | <b>-6.07*</b>       | 2.33                   | -10.65 to -1.49 |
| <b>Effusion</b>           |                     |                        |                 |
| Absent                    | Reference           | Reference              | Reference       |
| Present                   | -4.08               | 2.30                   | -8.59 to 0.44   |

Adjusting for age, sex, BMI, and radiographic stage (early/late)

\*Indicates significance at the 5% level
